# Supplementary material
Source: PubMed Central journal article supplement (PMC2586266)
Supplement: M804904200_1.pdf [file M804904200_1.pdf]

**A**

```

AAAAAAAAAA  GUAAAAACAG  CGCCUUCGGC GGGGUCCAGU  CCUCUGCCAC
UCUCGCUCCG  AGGUCCCCGC  GCCAGAGACU  CAGCCGCGCU  CCCACCACCC
ACACCCACCG  CGCCUCGUC   CGCCUCUUCU  CUAGGAGCCA  GUCCGCGCCA
CCGCCGCAGC  CCAGCCCAUC  GCCACCCUCC  GCAGCCAUG

```

**B**

```

GGCUUCUGGG  AGCGACCGCU  CCGCUCGUCU  CGUUGGUUCC  GGAGGUCGCU
GCGGCGGUGG  GAAAUG

```

**Supplemental Figure S2.** The 5' leaders of the 186-nt *vimentin* (**A**) and 63-nt *stomatin* (**B**) mRNAs contain complementary matches to the *Gtx*-binding site in 18S rRNA. For each 5' leader, the match to the *Gtx* element is indicated in bold red type, the complementary match to 18S rRNA is indicated by the boxed nucleotides, and the initiation codon is indicated in bold black type. For the *vimentin* mRNA, the match to the *Gtx* element is 7 contiguous nucleotides and the complementary match to human 18S rRNA at nucleotides 1125-1133 is 9 contiguous nucleotides; this complementary match includes two G:U base pairs. For the *stomatin* mRNA, the match to the *Gtx*-element is 6 contiguous nucleotides and corresponds to the complementary match to human 18S rRNA at nucleotides 1125-1131.
